# Supplementary material for: A role for gorilla APOBEC3G in shaping lentivirus evolution including transmission to humans
Source: PLoS Pathog. 2020 Sep 10;16(9):e1008812. doi: 10.1371/journal.ppat.1008812 (PMC7482973; doi:10.1371/journal.ppat.1008812)
Supplement: S4 Table — A full list of the primers used for the construction of SIVcpzPtt MBV897 IMC derivatives. (XLSX) [file ppat.1008812.s009.xlsx]

## Sheet: S4 Table
S4 Table. Primers for the construction of SIVcpzPtt MB897 IMC derivatives.
Product	Primer name	Sequence (5'-to-3')
MB897 M16E	MB897 3644-3663 Fwd	GAGAGCTGCCCATTCAAATG
	MB897 M16E Fwd	TGGCAGATAGACAGGGAGAGAGTTAAAGCATGG
	MB897 M16E Rev	CCATGCTTTAACTCTCTCCCTGTCTATCTGCCA
	MB897 7234-7253 Rev	GAGTCTCATTCCAGGCTGTC
MB897 E2X	MB897 3644-3663 Fwd	Same as above
	MB897 E2X Fwd	AATCAGGGACTATGTAAAACAGGTGGAAGG
	MB897 E2X Rev	CCTTCCACCTGTTTTACATAGTCCCTGATT
	MB897 7234-7253 Rev	Same as above
